# Supplementary material for: First-in-Class Cyclic Temporin L Analogue: Design, Synthesis, and Antimicrobial Assessment
Source: PubMed Central journal article supplement (PMC8389922; doi:10.1021/acs.jmedchem.1c01033), 2021-07-23
Supplement: jm1c01033_si_001.pdf [file jm1c01033_si_001.pdf]

# **First-in-class cyclic Temporin L analogue: design, synthesis and antimicrobial assessment**

Rosa Bellavita,<sup>1,§</sup> Bruno Casciaro,<sup>2,§</sup> Salvatore Di Maro,<sup>3</sup> Diego Brancaccio,<sup>1</sup> Alfonso Carotenuto,<sup>1</sup> Annarita Falanga,<sup>4</sup> Floriana Cappiello,<sup>5</sup> Elisabetta Buommino,<sup>1</sup> Stefania Galdiero,<sup>1</sup> Ettore Novellino,<sup>1</sup> Tom N. Grossmann,<sup>6</sup> Maria Luisa Mangoni,<sup>5</sup> Francesco Merlino<sup>1,\*</sup> and Paolo Grieco<sup>1</sup>

<sup>1</sup>Department of Pharmacy, University of Naples “Federico II”, Naples, 80131, Italy; <sup>2</sup>Center for Life Nano- & Neuro-Science, Fondazione Istituto Italiano di Tecnologia (IIT), Rome, 00161, Italy; <sup>3</sup>DiSTABiF, University of Campania “Luigi Vanvitelli”, Caserta, 81100, Italy; <sup>4</sup>Department of Agricultural Sciences, University of Naples “Federico II”, Portici, 80055, Italy; <sup>5</sup>Department of Biochemical Sciences, Laboratory affiliated to Istituto Pasteur Italia-Fondazione Cenci Bolognetti, Sapienza University of Rome, Rome, 00185, Italy; <sup>6</sup>Department of Chemistry & Pharmaceutical Sciences, VU University Amsterdam, Amsterdam, 1081 HZ, The Netherlands.

§ These authors contributed equally

\* corresponding author’s email: francesco.merlino@unina.it

## **Table of contents**

|                                                                                                                       |     |
|-----------------------------------------------------------------------------------------------------------------------|-----|
| 1. Synthetic paths for the achievement of key peptides <b>12</b> , <b>17</b> , <b>25</b> and <b>26</b> (Schemes S1-4) | S2  |
| 2. Analytical data of stapled peptides <b>10-26</b> (Table S1)                                                        | S5  |
| 3. NMR data of peptide <b>12</b> (Table S2)                                                                           | S6  |
| 4. NMR-based restraints used in the structure calculation (Table S3)                                                  | S7  |
| 5. HPLC chromatograms of stapled peptides <b>10-26</b> (Figures S1-17)                                                | S10 |

# 1. Synthetic paths for the achievement of key peptides **12**, **17**, **25** and **26**.

## Path A:

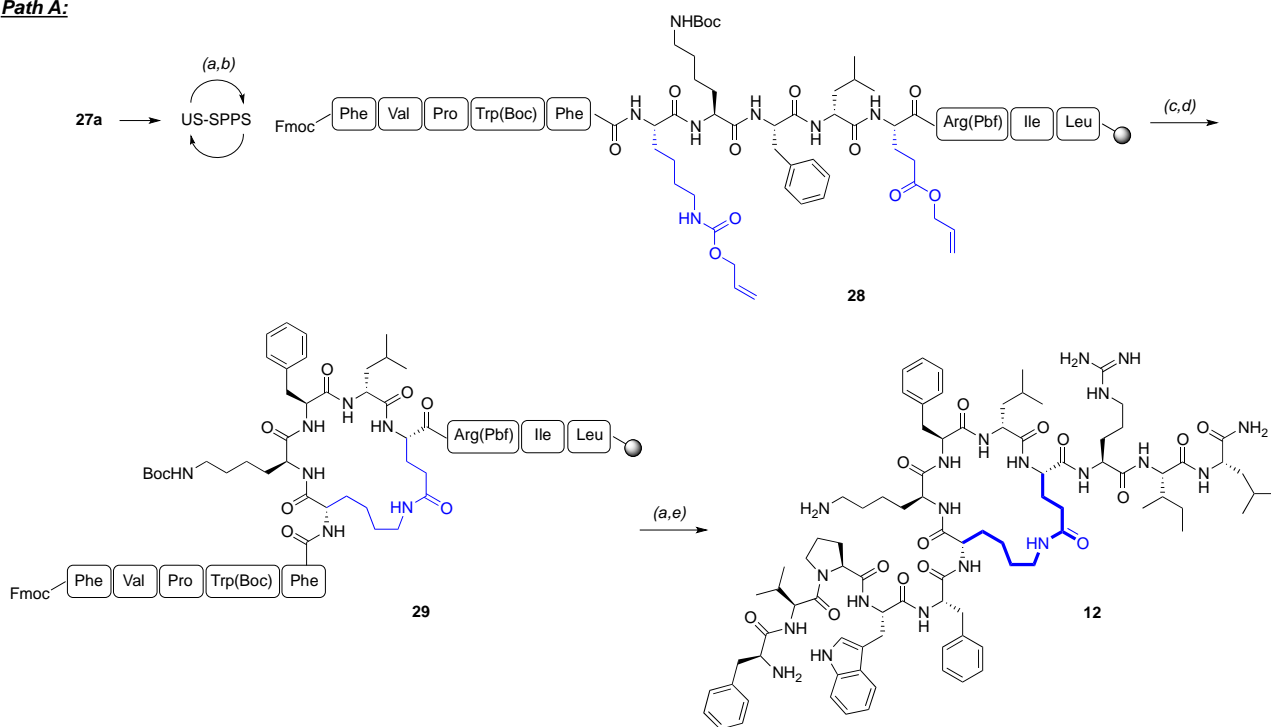

**Scheme S1.** (a) US-SPPS - Fmoc-deprotection: 20% piperidine in DMF, 0.5 + 1 min; (b) US-SPPS coupling: Fmoc-AA (2 equiv), COMU (2 equiv), Oxyma (2 equiv), DIEA (4 equiv), 5 min; (c) Pd(PPh<sub>3</sub>)<sub>4</sub> (0.15 equiv), 1,3-dimethylbarbituric acid (3 equiv), DCM/DMF (3:2, v/v), 2 × 1 h; (d) PyAOP (2 equiv), HOAt (2 equiv), DIEA (4 equiv), DCM/DMF (1:1, v/v), 16 h; (e) TFA/TIS/H<sub>2</sub>O (95:2.5:2.5, v/v/v), 3 h.

**Path B:**

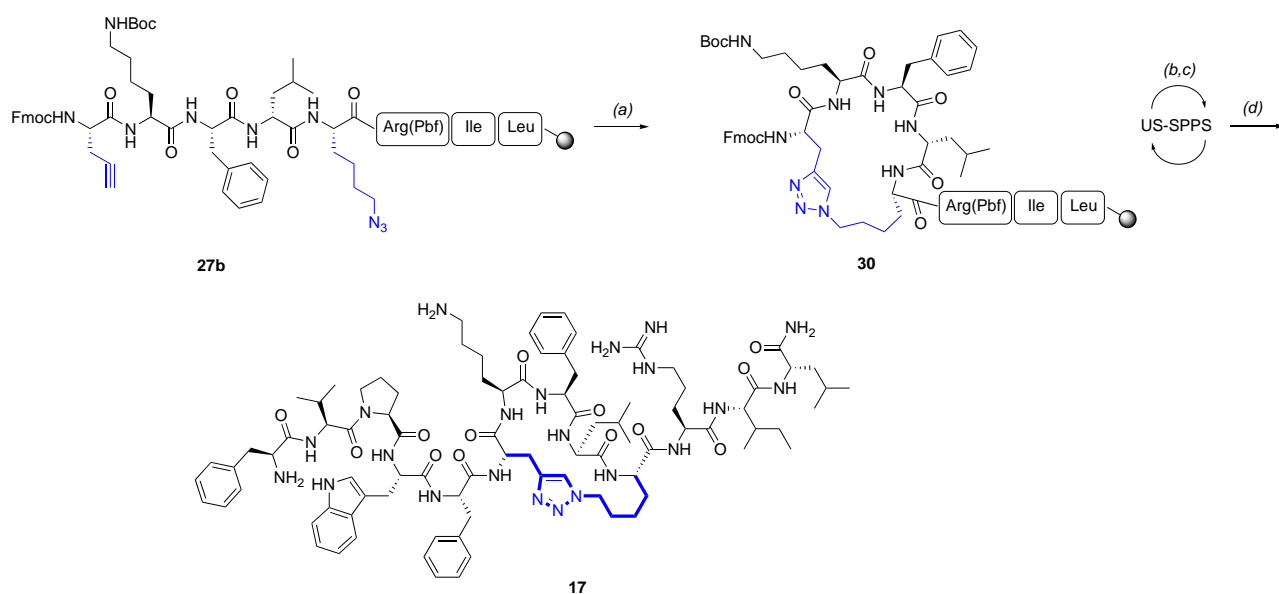

**Scheme S2.** (a) CuI (1 equiv), ascorbic acid (3 equiv), 2,4,6-collidine (5 equiv), DIEA (10 equiv), DMF,  $3 \times 1$  h; (b) US-SPPS Fmoc-deprotection: 20% piperidine in DMF, 0.5 + 1 min; (c) US-SPPS coupling: Fmoc-AA (2 equiv), COMU (2 equiv), Oxyma (2 equiv), DIEA (4 equiv), 5 min; (d) TFA/TIS/H<sub>2</sub>O (95:2.5:2.5, v/v/v), 3 h.

**Path C:**

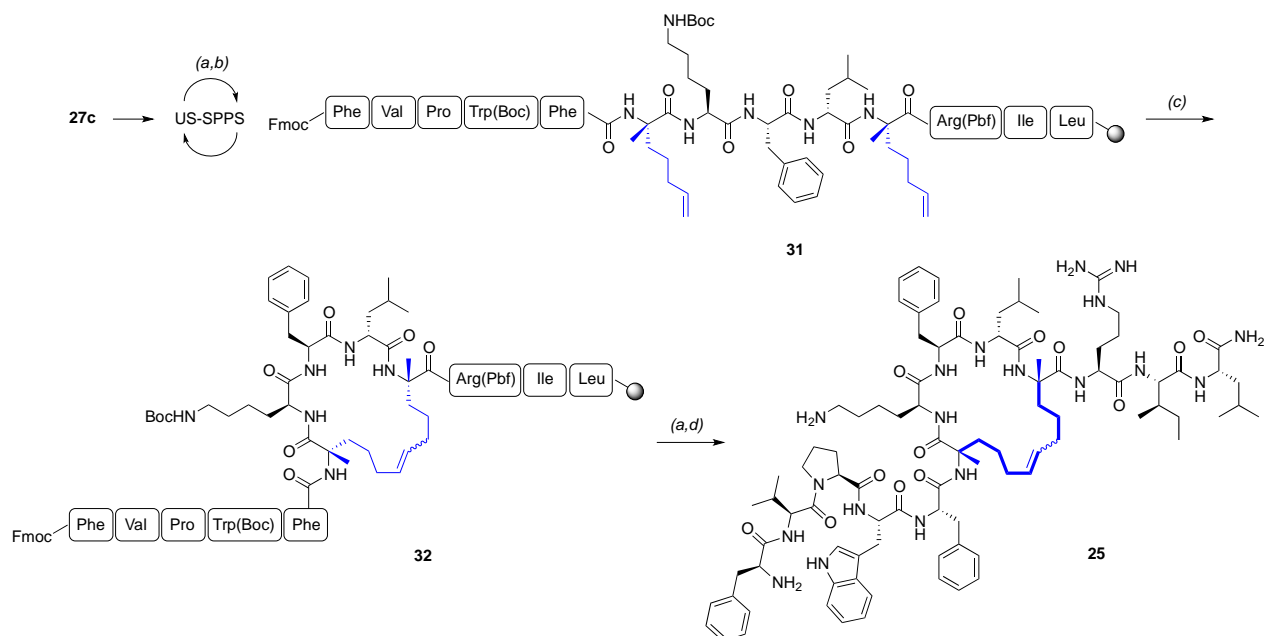

**Scheme S3.** (a) US-SPPS Fmoc-deprotection: 20% piperidine in DMF, 0.5 + 1 min; (b) US-SPPS coupling: Fmoc-AA (2 equiv), COMU (2 equiv), Oxyma (2 equiv), DIEA (4 equiv), 5 min; (c) 6 mM solution (3 mL) of the Grubbs' 1<sup>st</sup> generation catalyst in DCE (20 mol% relative to the resin substitution),  $3 \times 2$  h, under nitrogen; (d) TFA/TIS/H<sub>2</sub>O (95:2.5:2.5, v/v/v), 3 h.

**Path D:**

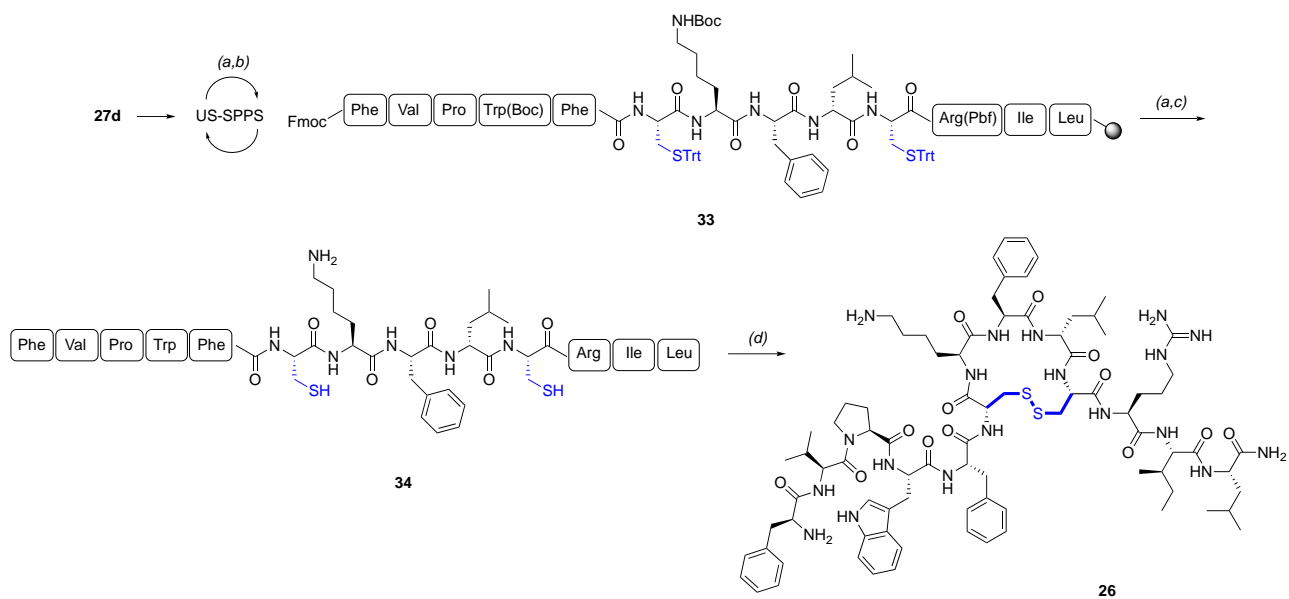

**Scheme S4.** (a) US-SPPS Fmoc-deprotection: 20% piperidine in DMF, 0.5 + 1 min; (b) US-SPPS coupling: Fmoc-AA (2 equiv), COMU (2 equiv), Oxyma (2 equiv), DIEA (4 equiv), 5 min; (c) TFA/TIS/H<sub>2</sub>O (95:2.5:2.5, v/v/v), 3 h; (d) NCS (1 equiv), H<sub>2</sub>O for [peptide]= 0.5 mM, 15 min.

**Table S1.** Analytical data for peptides **10-26**.

| <b>ID</b> | <b>t<sub>R</sub></b><br><b>(min)</b> | <b>Molecular</b><br><b>Formula</b>                                                           | <b>[M+H]<sup>+</sup></b> <i>calcd</i> | <b>[M+2H]<sup>+</sup>/2</b> <i>obs</i> |
|-----------|--------------------------------------|----------------------------------------------------------------------------------------------|---------------------------------------|----------------------------------------|
| <b>10</b> | 11.6                                 | C <sub>82</sub> H <sub>117</sub> N <sub>20</sub> O <sub>15</sub> <sup>+</sup>                | 1621.9002                             | 811.9556                               |
| <b>11</b> | 11.4                                 | C <sub>79</sub> H <sub>119</sub> N <sub>20</sub> O <sub>15</sub> <sup>+</sup>                | 1587.9158                             | 794.4611                               |
| <b>12</b> | 13.9                                 | C <sub>89</sub> H <sub>131</sub> N <sub>20</sub> O <sub>14</sub> <sup>+</sup>                | 1704.0148                             | 853.0122                               |
| <b>13</b> | 11.3                                 | C <sub>79</sub> H <sub>118</sub> N <sub>20</sub> O <sub>15</sub> <sup>+</sup>                | 1586.9080                             | 794.9626                               |
| <b>14</b> | 14.7                                 | C <sub>74</sub> H <sub>119</sub> N <sub>19</sub> O <sub>15</sub> <sup>+</sup>                | 1513.9128                             | 757.9648                               |
| <b>15</b> | 11.6                                 | C <sub>82</sub> H <sub>115</sub> N <sub>22</sub> O <sub>14</sub> <sup>+</sup>                | 1631.8958                             | 816.4502                               |
| <b>16</b> | 11.3                                 | C <sub>79</sub> H <sub>117</sub> N <sub>22</sub> O <sub>14</sub> <sup>+</sup>                | 1597.9114                             | 799.9601                               |
| <b>17</b> | 14.5                                 | C <sub>89</sub> H <sub>129</sub> N <sub>22</sub> O <sub>13</sub> <sup>+</sup>                | 1714.0104                             | 858.0162                               |
| <b>18</b> | 13.2                                 | C <sub>79</sub> H <sub>117</sub> N <sub>22</sub> O <sub>14</sub> <sup>+</sup>                | 1597.9114                             | 799.9601                               |
| <b>19</b> | 11.7                                 | C <sub>74</sub> H <sub>118</sub> N <sub>21</sub> O <sub>14</sub> <sup>+</sup>                | 1524.9162                             | 761.9532                               |
| <b>20</b> | 12.1                                 | C <sub>85</sub> H <sub>122</sub> N <sub>20</sub> O <sub>14</sub> <sup>+</sup>                | 1646.9444                             | 824.9761                               |
| <b>21</b> | 11.4                                 | C <sub>79</sub> H <sub>119</sub> N <sub>20</sub> O <sub>15</sub> <sup>+</sup>                | 1587.9158                             | 794.4587                               |
| <b>22</b> | 11.6                                 | C <sub>85</sub> H <sub>121</sub> N <sub>22</sub> O <sub>13</sub> <sup>+</sup>                | 1657.9478                             | 829.9784                               |
| <b>23</b> | 11.2                                 | C <sub>79</sub> H <sub>117</sub> N <sub>22</sub> O <sub>14</sub> <sup>+</sup>                | 1597.9114                             | 799.4593                               |
| <b>24</b> | 13.9                                 | C <sub>89</sub> H <sub>131</sub> N <sub>20</sub> O <sub>14</sub> <sup>+</sup>                | 1704.0148                             | 853.0121                               |
| <b>25</b> | 14.9                                 | C <sub>92</sub> H <sub>136</sub> N <sub>19</sub> O <sub>13</sub> <sup>+</sup>                | 1715.0560                             | 858.0627                               |
| <b>26</b> | 14.2                                 | C <sub>84</sub> H <sub>122</sub> N <sub>19</sub> O <sub>13</sub> S <sub>2</sub> <sup>+</sup> | 1668.8905                             | 835.8973                               |

**Table S2.**  $^1\text{H}$  NMR resonance assignments<sup>a</sup> of peptide **12** in SDS/DPC 9:1 solution

| residue | NH ( $-\Delta\delta/\Delta T$ ) <sup>b</sup> | C <sup><math>\alpha</math></sup> H | C <sup><math>\beta</math></sup> H | Others                                                                                |
|---------|----------------------------------------------|------------------------------------|-----------------------------------|---------------------------------------------------------------------------------------|
| Phe 1   |                                              | 4.43                               | 3.23, 3.17                        | 7.73( $\delta$ ); 7.27 ( $\epsilon$ )                                                 |
| Val 2   | 7.74 (3.7)                                   | 4.19                               | 1.79                              | 0.69, 0.63( $\gamma$ )                                                                |
| Pro 3   |                                              | 4.39                               | 2.26                              | 2.01( $\gamma$ ); 3.70( $\delta$ )                                                    |
| Trp 4   | 7.56 (2.9)                                   | 4.29                               | 3.26, 3.19                        | 7.36( $\delta$ ); 10.00, 7.21( $\epsilon$ ); 7.29, 6.81( $\zeta$ );<br>6.88( $\eta$ ) |
| Phe 5   | 7.84 (nd)                                    | 4.19                               | 2.89, 2.62                        | 7.08( $\delta$ ); 7.17( $\epsilon$ )                                                  |
| Lys* 6  | 7.84 (7.5)                                   | 3.85                               | 1.56, 1.36                        | 1.19( $\gamma$ ); 1.46( $\delta$ ); 2.65( $\epsilon$ )                                |
| Lys 7   | 7.81 (2.9)                                   | 3.97                               | 1.85                              | 1.48( $\gamma$ ); 1.66( $\delta$ ); 2.94( $\epsilon$ ); 7.38( $\zeta$ )               |
| Phe 8   | 8.19 (5.2)                                   | 4.24                               | 3.07, 2.97                        | 7.11( $\delta$ ); 7.16( $\epsilon$ )                                                  |
| DLeu 9  | 8.63 (5.0)                                   | 3.69                               | 1.78                              | 1.387( $\gamma$ ); 0.70, 0.64( $\delta$ )                                             |
| Glu*10  | 7.94 (2.9)                                   | 3.82                               | 1.97                              | 2.31, 2.20( $\gamma$ )                                                                |
| Arg 11  | 7.96 (2.2)                                   | 4.07                               | 1.97                              | 1.70, 1.59( $\gamma$ ); 3.25, 3.13( $\delta$ ); 7.26( $\epsilon$ )                    |
| Ile 12  | 7.51 (3.1)                                   | 3.91                               | 1.72                              | 1.04, 1.00, 0.84 ( $\gamma$ ); 0.76( $\delta$ )                                       |
| Leu 13  | 8.04 (6.0)                                   | 4.26                               | 1.53                              | 1.68( $\gamma$ ); 0.85( $\delta$ )                                                    |

<sup>a</sup> Obtained at 25 °C, pH= 5.5, with TSP ( $\delta$  0.00 ppm) as reference shift. Chemical shifts are accurate to  $\pm 0.02$  ppm.  $-\Delta\delta/\Delta T$  = temperature coefficients (ppb/K); nd: not determined. CONH<sub>2</sub> (C-terminal amide protons) 7.00, 6.86. \*Cyclic residues.

**Table S3.** NOE derived upper limit constraints used for peptide **12** structure calculation.

|   |      |     |   |      |     |      |
|---|------|-----|---|------|-----|------|
| 1 | PHE  | HA  | 1 | PHE  | HB2 | 3.02 |
| 1 | PHE  | HA  | 1 | PHE  | HB3 | 3.02 |
| 1 | PHE  | HA  | 1 | PHE  | QD  | 5.64 |
| 1 | PHE  | HA  | 2 | VAL  | HN  | 2.74 |
| 1 | PHE  | HB2 | 2 | VAL  | HN  | 3.55 |
| 1 | PHE  | HB3 | 2 | VAL  | HN  | 3.55 |
| 1 | PHE  | QD  | 2 | VAL  | HN  | 6.88 |
| 1 | PHE  | QD  | 2 | VAL  | HA  | 7.22 |
| 1 | PHE  | QD  | 2 | VAL  | QG1 | 8.40 |
| 1 | PHE  | QD  | 2 | VAL  | QG2 | 8.40 |
| 1 | PHE  | QD  | 2 | VAL  | QQG | 6.93 |
| 1 | PHE  | QE  | 2 | VAL  | HA  | 7.62 |
| 1 | PHE  | QE  | 2 | VAL  | QG1 | 8.65 |
| 1 | PHE  | QE  | 2 | VAL  | QG2 | 8.65 |
| 2 | VAL  | HN  | 2 | VAL  | HB  | 3.05 |
| 2 | VAL  | HN  | 2 | VAL  | QQG | 4.15 |
| 2 | VAL  | HN  | 3 | PRO  | QD  | 6.16 |
| 2 | VAL  | HA  | 2 | VAL  | QG1 | 3.83 |
| 2 | VAL  | HA  | 2 | VAL  | QG2 | 3.83 |
| 2 | VAL  | HA  | 3 | PRO  | QD  | 3.87 |
| 2 | VAL  | HB  | 3 | PRO  | QD  | 5.45 |
| 2 | VAL  | HB  | 4 | TRP  | HD1 | 5.07 |
| 2 | VAL  | HB  | 4 | TRP  | HE1 | 4.85 |
| 2 | VAL  | QG1 | 4 | TRP  | HE1 | 5.78 |
| 2 | VAL  | QG2 | 4 | TRP  | HE1 | 5.78 |
| 2 | VAL  | QQG | 4 | TRP  | HD1 | 5.35 |
| 2 | VAL  | QQG | 4 | TRP  | HE1 | 4.95 |
| 3 | PRO  | HA  | 7 | LYS  | HN  | 3.92 |
| 3 | PRO  | QD  | 4 | TRP  | HD1 | 6.38 |
| 4 | TRP  | HN  | 4 | TRP  | HB2 | 3.42 |
| 4 | TRP  | HN  | 4 | TRP  | HB3 | 3.42 |
| 4 | TRP  | HN  | 4 | TRP  | QB  | 2.96 |
| 4 | TRP  | HN  | 4 | TRP  | HD1 | 3.36 |
| 4 | TRP  | HN  | 5 | PHE  | HN  | 4.17 |
| 4 | TRP  | HA  | 4 | TRP  | HB2 | 2.80 |
| 4 | TRP  | HA  | 4 | TRP  | HB3 | 2.80 |
| 4 | TRP  | HA  | 4 | TRP  | HD1 | 3.73 |
| 4 | TRP  | HA  | 4 | TRP  | HE3 | 3.89 |
| 4 | TRP  | HA  | 7 | LYS  | QB  | 4.49 |
| 4 | TRP  | HB2 | 4 | TRP  | HD1 | 3.61 |
| 4 | TRP  | HB3 | 4 | TRP  | HD1 | 3.61 |
| 4 | TRP  | QB  | 4 | TRP  | HD1 | 3.07 |
| 4 | TRP  | QB  | 4 | TRP  | HE3 | 3.38 |
| 5 | PHE  | HN  | 5 | PHE  | HB2 | 3.52 |
| 5 | PHE  | HN  | 5 | PHE  | HB3 | 3.52 |
| 5 | PHE  | HN  | 5 | PHE  | QB  | 3.01 |
| 5 | PHE  | HA  | 5 | PHE  | QD  | 6.85 |
| 5 | PHE  | HA  | 8 | PHE  | HN  | 5.50 |
| 6 | LYSS | HN  | 8 | PHE  | HN  | 4.23 |
| 6 | LYSS | HA  | 7 | LYS  | HN  | 3.39 |
| 6 | LYSS | HA  | 9 | DLEU | HN  | 3.76 |
| 6 | LYSS | QB  | 6 | LYSS | QE  | 4.06 |
| 7 | LYS  | HN  | 7 | LYS  | HA  | 2.80 |

|    |      |     |    |      |     |      |
|----|------|-----|----|------|-----|------|
| 7  | LYS  | HN  | 7  | LYS  | QB  | 3.62 |
| 7  | LYS  | HN  | 7  | LYS  | QG  | 5.20 |
| 7  | LYS  | HN  | 7  | LYS  | QD  | 5.17 |
| 7  | LYS  | HN  | 8  | PHE  | HN  | 3.08 |
| 7  | LYS  | HA  | 10 | GLUS | HN  | 3.61 |
| 7  | LYS  | HA  | 10 | GLUS | QG  | 4.03 |
| 7  | LYS  | QB  | 7  | LYS  | QE  | 7.25 |
| 7  | LYS  | QB  | 7  | LYS  | QZ  | 7.19 |
| 7  | LYS  | QG  | 7  | LYS  | QZ  | 7.19 |
| 8  | PHE  | HN  | 8  | PHE  | HB2 | 3.17 |
| 8  | PHE  | HN  | 8  | PHE  | HB3 | 3.17 |
| 8  | PHE  | HN  | 8  | PHE  | QD  | 7.62 |
| 8  | PHE  | HN  | 9  | DLEU | HN  | 3.64 |
| 8  | PHE  | HA  | 8  | PHE  | HB2 | 2.93 |
| 8  | PHE  | HA  | 8  | PHE  | HB3 | 2.93 |
| 8  | PHE  | HA  | 8  | PHE  | QB  | 2.55 |
| 8  | PHE  | HA  | 8  | PHE  | QD  | 5.45 |
| 8  | PHE  | HA  | 8  | PHE  | QE  | 6.35 |
| 8  | PHE  | HA  | 11 | ARG+ | HN  | 3.76 |
| 8  | PHE  | HA  | 11 | ARG+ | QB  | 4.33 |
| 8  | PHE  | HA  | 12 | ILE  | HN  | 4.32 |
| 8  | PHE  | QB  | 9  | DLEU | HN  | 3.40 |
| 8  | PHE  | QD  | 9  | DLEU | HN  | 7.62 |
| 9  | DLEU | HN  | 9  | DLEU | QQD | 5.35 |
| 9  | DLEU | HN  | 10 | GLUS | HN  | 3.36 |
| 9  | DLEU | HA  | 9  | DLEU | QD1 | 4.67 |
| 9  | DLEU | HA  | 9  | DLEU | QD2 | 4.67 |
| 9  | DLEU | HA  | 9  | DLEU | QQD | 3.62 |
| 9  | DLEU | HA  | 10 | GLUS | HN  | 3.42 |
| 10 | GLUS | HN  | 10 | GLUS | QB  | 4.14 |
| 10 | GLUS | HN  | 10 | GLUS | HG2 | 3.33 |
| 10 | GLUS | HN  | 10 | GLUS | HG3 | 3.33 |
| 10 | GLUS | HN  | 10 | GLUS | QG  | 2.82 |
| 10 | GLUS | HA  | 10 | GLUS | HG2 | 3.79 |
| 10 | GLUS | HA  | 10 | GLUS | HG3 | 3.79 |
| 10 | GLUS | HA  | 13 | LEU  | HN  | 3.61 |
| 10 | GLUS | HA  | 14 | CNH2 | HN1 | 4.51 |
| 10 | GLUS | HA  | 14 | CNH2 | HN2 | 4.85 |
| 11 | ARG+ | HN  | 11 | ARG+ | QB  | 4.11 |
| 11 | ARG+ | HN  | 12 | ILE  | HN  | 3.27 |
| 11 | ARG+ | HA  | 11 | ARG+ | HG2 | 3.76 |
| 11 | ARG+ | HA  | 11 | ARG+ | HG3 | 3.76 |
| 11 | ARG+ | HA  | 11 | ARG+ | QG  | 3.23 |
| 11 | ARG+ | HA  | 11 | ARG+ | QD  | 3.71 |
| 11 | ARG+ | HA  | 12 | ILE  | HN  | 3.64 |
| 11 | ARG+ | HA  | 14 | CNH2 | HN1 | 5.50 |
| 11 | ARG+ | QB  | 11 | ARG+ | HE  | 5.38 |
| 11 | ARG+ | QB  | 12 | ILE  | HN  | 4.24 |
| 11 | ARG+ | HG2 | 11 | ARG+ | HE  | 3.98 |
| 11 | ARG+ | HG3 | 11 | ARG+ | HE  | 3.98 |
| 11 | ARG+ | QG  | 11 | ARG+ | HE  | 3.37 |
| 11 | ARG+ | QG  | 12 | ILE  | HN  | 4.47 |
| 12 | ILE  | HN  | 12 | ILE  | HB  | 2.83 |
| 12 | ILE  | HN  | 12 | ILE  | QG2 | 4.67 |
| 12 | ILE  | HN  | 12 | ILE  | QG1 | 3.39 |
| 12 | ILE  | HN  | 12 | ILE  | QD1 | 5.54 |
| 12 | ILE  | HN  | 13 | LEU  | HN  | 2.74 |



|    |     |     |    |      |     |      |
|----|-----|-----|----|------|-----|------|
| 12 | ILE | HN  | 13 | LEU  | QQD | 7.63 |
| 12 | ILE | HN  | 14 | CNH2 | HN1 | 5.50 |
| 12 | ILE | HA  | 12 | ILE  | QG2 | 3.68 |
| 12 | ILE | HA  | 12 | ILE  | QG1 | 3.31 |
| 12 | ILE | HA  | 12 | ILE  | QD1 | 4.08 |
| 12 | ILE | HA  | 13 | LEU  | HN  | 3.36 |
| 12 | ILE | HB  | 13 | LEU  | HN  | 2.90 |
| 12 | ILE | QG2 | 12 | ILE  | QG1 | 3.30 |
| 12 | ILE | QG2 | 13 | LEU  | HN  | 4.76 |
| 13 | LEU | HN  | 13 | LEU  | HA  | 2.86 |
| 13 | LEU | HN  | 13 | LEU  | QB  | 4.18 |
| 13 | LEU | HN  | 13 | LEU  | HG  | 2.43 |
| 13 | LEU | HN  | 13 | LEU  | QQD | 6.02 |
| 13 | LEU | HN  | 14 | CNH2 | HN1 | 3.30 |
| 13 | LEU | HN  | 14 | CNH2 | HN2 | 3.92 |
| 13 | LEU | HA  | 13 | LEU  | HG  | 3.33 |
| 13 | LEU | HA  | 13 | LEU  | QQD | 4.59 |
| 13 | LEU | QB  | 14 | CNH2 | HN1 | 6.38 |
| 13 | LEU | HG  | 14 | CNH2 | HN1 | 4.17 |
| 13 | LEU | HG  | 14 | CNH2 | HN2 | 4.72 |
| 13 | LEU | QQD | 14 | CNH2 | HN1 | 7.63 |
| 13 | LEU | QQD | 14 | CNH2 | HN2 | 7.63 |

## 5. HPLC chromatograms of peptides **10-26**:

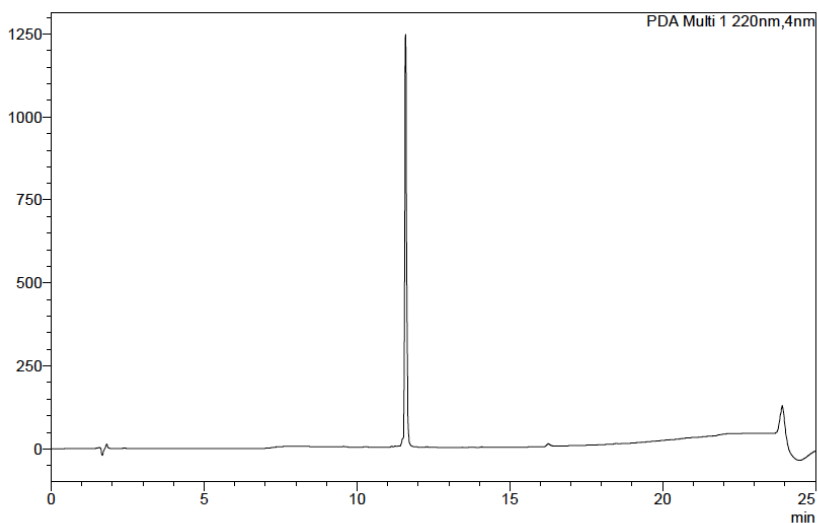

**Figure S1.** Chromatogram of **10** obtained by an analytical HPLC (Shimadzu UFLC SPD-M20A/DGU-20A3R/LC-20AD) equipped with a Phenomenex Kinetex C18 column (150 mm  $\times$  4.6 mm, 5  $\mu$ m, 100  $\text{\AA}$ ), and monitored by UV detection at 220 nm.  $t_R$ : 11.6 min [linear gradient 10-90% MeCN (0.1% TFA) in H<sub>2</sub>O (0.1% TFA) over 20 min, flow rate of 1 mL/min].

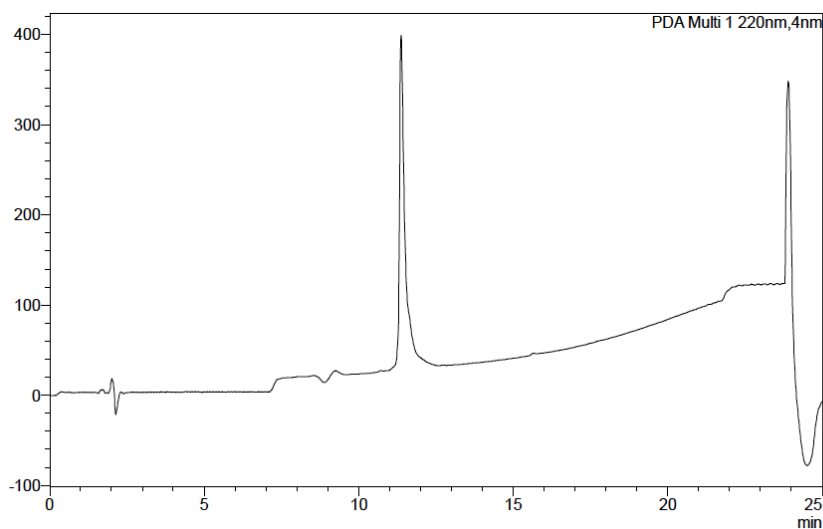

**Figure S2.** Chromatogram of **11** obtained by an analytical HPLC (Shimadzu UFLC SPD-M20A/DGU-20A3R/LC-20AD) equipped with a Phenomenex Kinetex C18 column (150 mm  $\times$  4.6 mm, 5  $\mu$ m, 100  $\text{\AA}$ ), and monitored by UV detection at 220 nm.  $t_R$ : 11.4 min [linear gradient 10-90% MeCN (0.1% TFA) in H<sub>2</sub>O (0.1% TFA) over 20 min, flow rate of 1 mL/min].

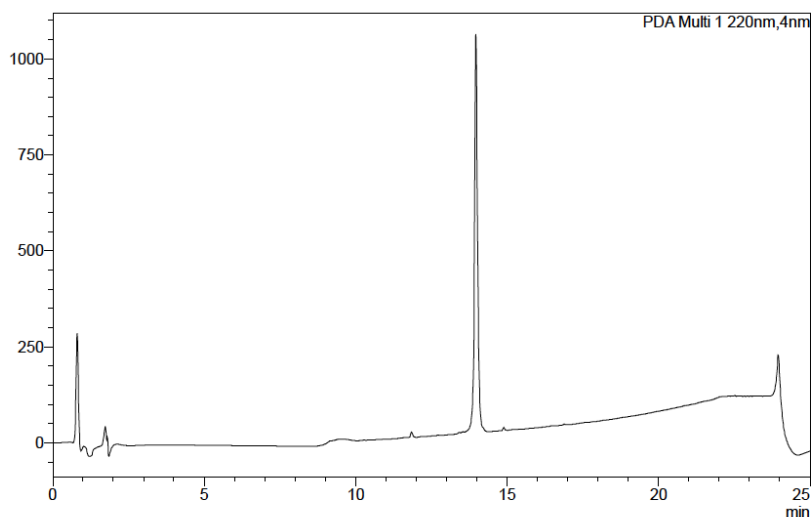

**Figure S3.** Chromatogram of **12** obtained by an analytical HPLC (Shimadzu UFLC SPD-M20A/DGU-20A3R/LC-20AD) equipped with a Phenomenex Kinetex C18 column (150 mm  $\times$  4.6 mm, 5  $\mu$ m, 100  $\text{\AA}$ ), and monitored by UV detection at 220 nm.  $t_R$ : 13.9 min [linear gradient 10-90% MeCN (0.1% TFA) in H<sub>2</sub>O (0.1% TFA) over 20 min, flow rate of 1 mL/min].

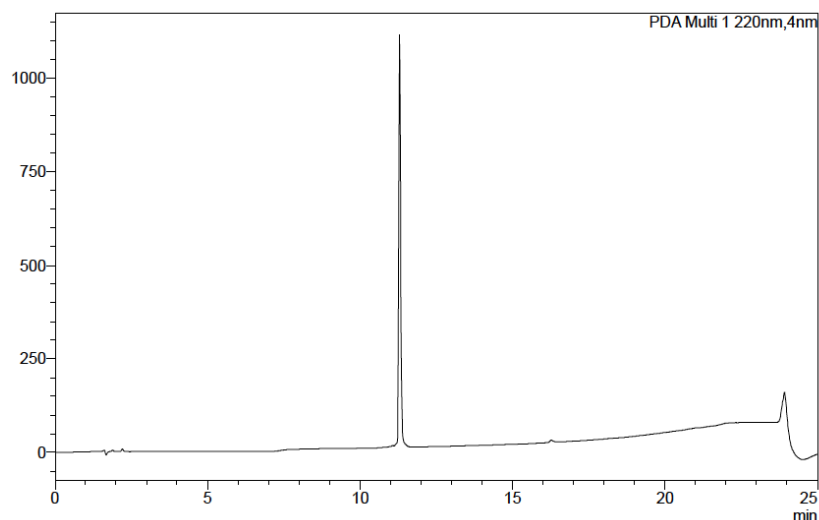

**Figure S4.** Chromatogram of **13** obtained by an analytical HPLC (Shimadzu UFLC SPD-M20A/DGU-20A3R/LC-20AD) equipped with a Phenomenex Kinetex C18 column (150 mm  $\times$  4.6 mm, 5  $\mu$ m, 100  $\text{\AA}$ ), and monitored by UV detection at 220 nm.  $t_R$ : 11.3 min [linear gradient 10-90% MeCN (0.1% TFA) in H<sub>2</sub>O (0.1% TFA) over 20 min, flow rate of 1 mL/min].

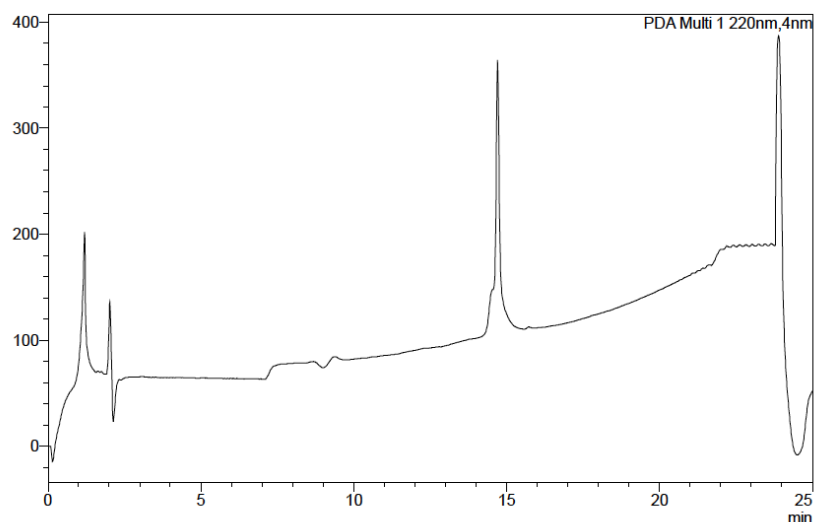

**Figure S5.** Chromatogram of **14** obtained by an analytical HPLC (Shimadzu UFLC SPD-M20A/DGU-20A3R/LC-20AD) equipped with a Phenomenex Kinetex C18 column (150 mm  $\times$  4.6 mm, 5  $\mu$ m, 100  $\text{\AA}$ ), and monitored by UV detection at 220 nm.  $t_R$ : 14.7 min [linear gradient 10-90% MeCN (0.1% TFA) in H<sub>2</sub>O (0.1% TFA) over 20 min, flow rate of 1 mL/min].

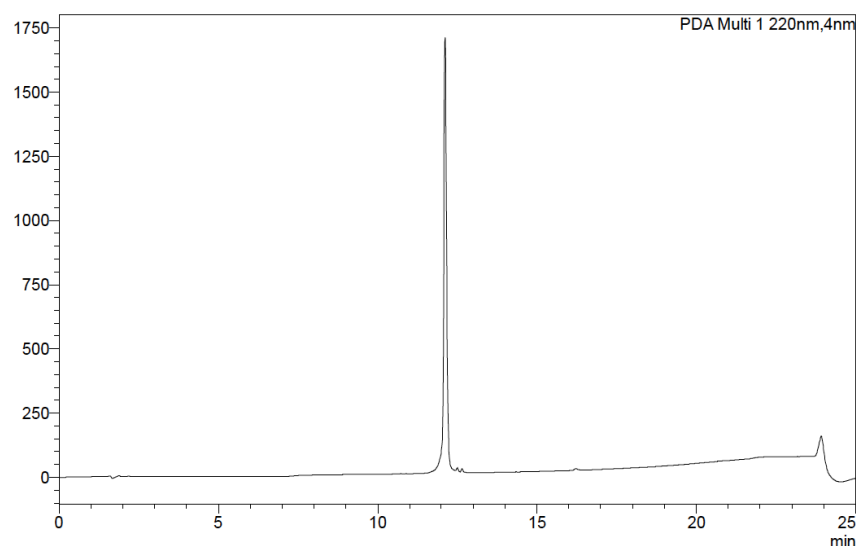

**Figure S6.** Chromatogram of **15** obtained by an analytical HPLC (Shimadzu UFLC SPD-M20A/DGU-20A3R/LC-20AD) equipped with a Phenomenex Kinetex C18 column (150 mm  $\times$  4.6 mm, 5  $\mu$ m, 100  $\text{\AA}$ ), and monitored by UV detection at 220 nm.  $t_R$ : 11.6 min [linear gradient 10-90% MeCN (0.1% TFA) in H<sub>2</sub>O (0.1% TFA) over 20 min, flow rate of 1 mL/min].

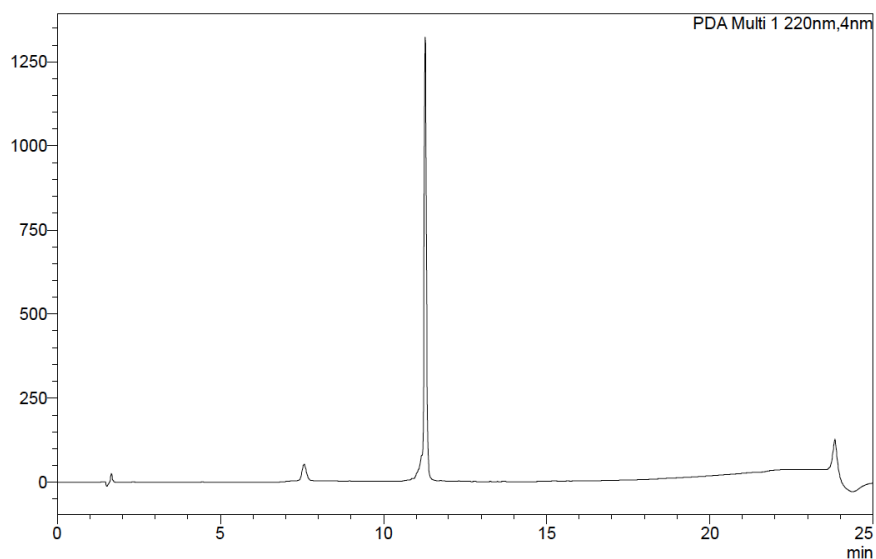

**Figure S7.** Chromatogram of **16** obtained by an analytical HPLC (Shimadzu UFLC SPD-M20A/DGU-20A3R/LC-20AD) equipped with a Phenomenex Kinetex C18 column (150 mm  $\times$  4.6 mm, 5  $\mu$ m, 100 Å), and monitored by UV detection at 220 nm.  $t_R$ : 11.3 min [linear gradient 10-90% MeCN (0.1% TFA) in H<sub>2</sub>O (0.1% TFA) over 20 min, flow rate of 1 mL/min].

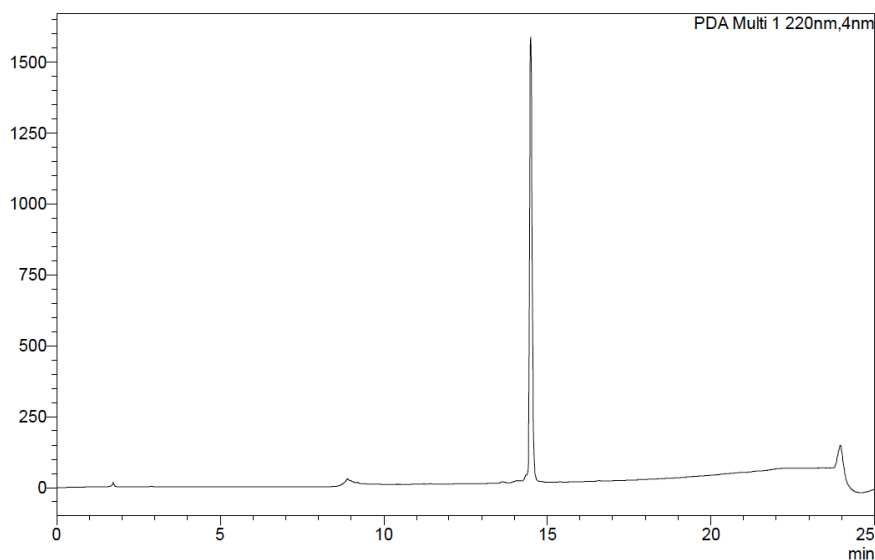

**Figure S8.** Chromatogram of **17** obtained by an analytical HPLC (Shimadzu UFLC SPD-M20A/DGU-20A3R/LC-20AD) equipped with a Phenomenex Kinetex C18 column (150 mm  $\times$  4.6 mm, 5  $\mu$ m, 100 Å), and monitored by UV detection at 220 nm.  $t_R$ : 14.5 min [linear gradient 10-90% MeCN (0.1% TFA) in H<sub>2</sub>O (0.1% TFA) over 20 min, flow rate of 1 mL/min].

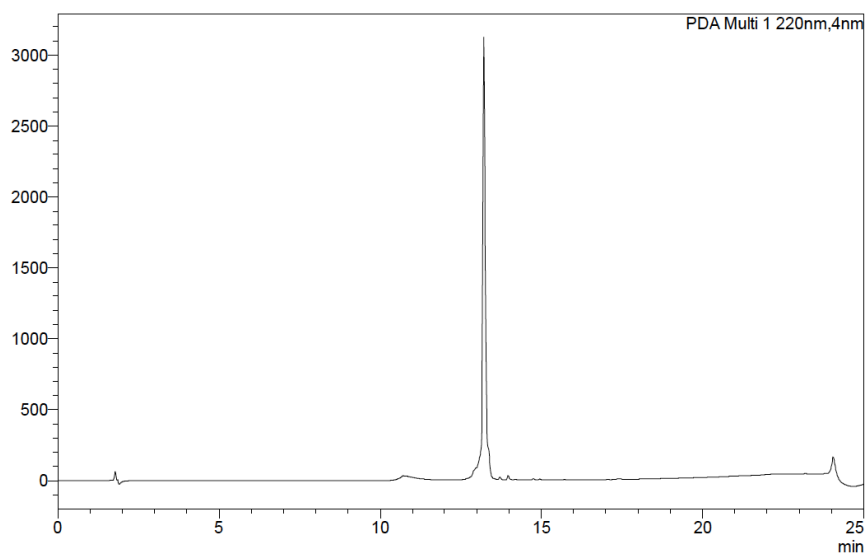

**Figure S9.** Chromatogram of **18** obtained by an analytical HPLC (Shimadzu UFLC SPD-M20A/DGU-20A3R/LC-20AD) equipped with a Phenomenex Kinetex C18 column (150 mm  $\times$  4.6 mm, 5  $\mu$ m, 100  $\text{\AA}$ ), and monitored by UV detection at 220 nm.  $t_R$ : 13.2 min [linear gradient 10-90% MeCN (0.1% TFA) in H<sub>2</sub>O (0.1% TFA) over 20 min, flow rate of 1 mL/min].

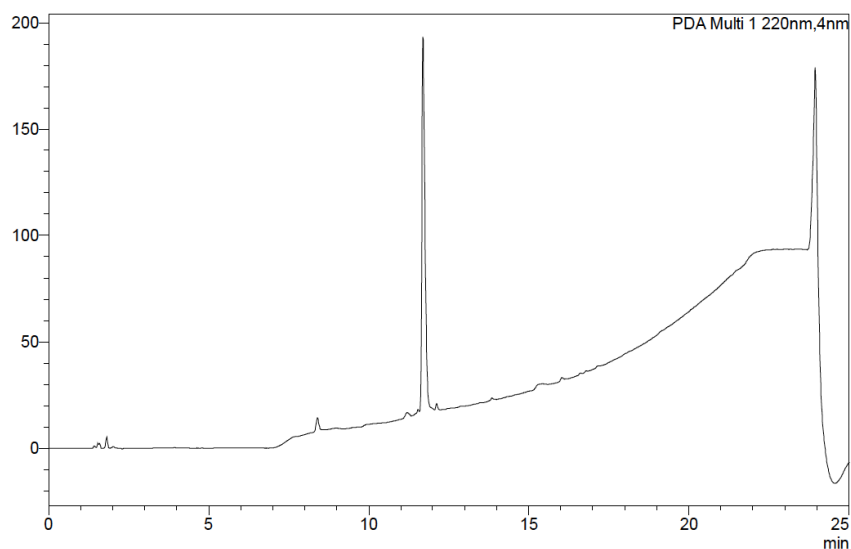

**Figure S10.** Chromatogram of **19** obtained by an analytical HPLC (Shimadzu UFLC SPD-M20A/DGU-20A3R/LC-20AD) equipped with a Phenomenex Kinetex C18 column (150 mm  $\times$  4.6 mm, 5  $\mu$ m, 100  $\text{\AA}$ ), and monitored by UV detection at 220 nm.  $t_R$ : 11.7 min [linear gradient 10-90% MeCN (0.1% TFA) in H<sub>2</sub>O (0.1% TFA) over 20 min, flow rate of 1 mL/min].

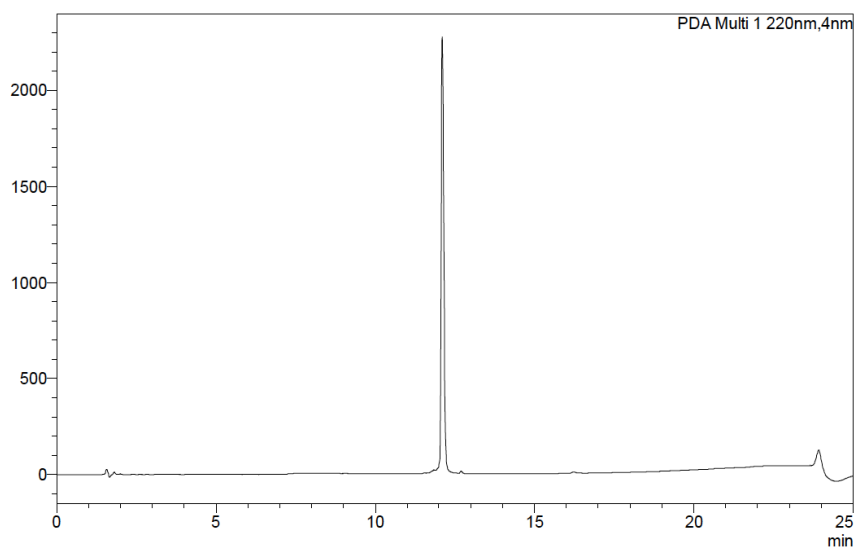

**Figure S11.** Chromatogram of **20** obtained by an analytical HPLC (Shimadzu UFLC SPD-M20A/DGU-20A3R/LC-20AD) equipped with a Phenomenex Kinetex C18 column (150 mm  $\times$  4.6 mm, 5  $\mu$ m, 100  $\text{\AA}$ ), and monitored by UV detection at 220 nm.  $t_R$ : 12.1 [linear gradient 10-90% MeCN (0.1% TFA) in H<sub>2</sub>O (0.1% TFA) over 20 min, flow rate of 1 mL/min].

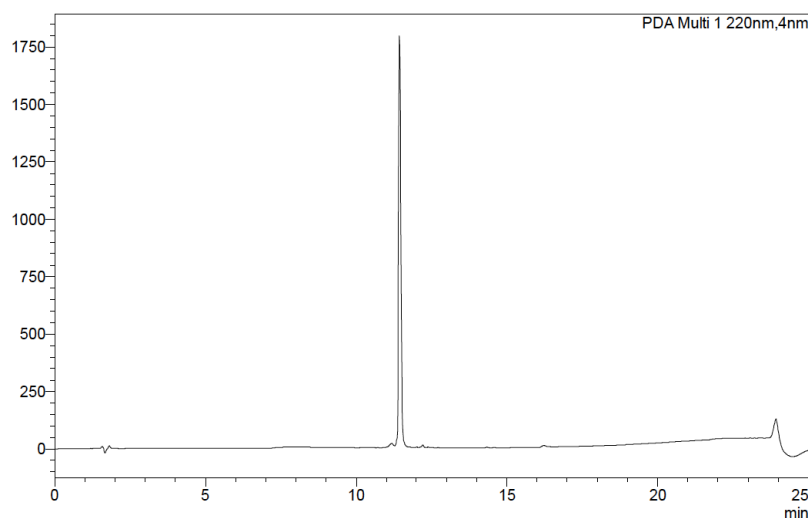

**Figure S12.** Chromatogram of **21** obtained by an analytical HPLC (Shimadzu UFLC SPD-M20A/DGU-20A3R/LC-20AD) equipped with a Phenomenex Kinetex C18 column (150 mm  $\times$  4.6 mm, 5  $\mu$ m, 100  $\text{\AA}$ ), and monitored by UV detection at 220 nm.  $t_R$ : 11.4 [linear gradient 10-90% MeCN (0.1% TFA) in H<sub>2</sub>O (0.1% TFA) over 20 min, flow rate of 1 mL/min].

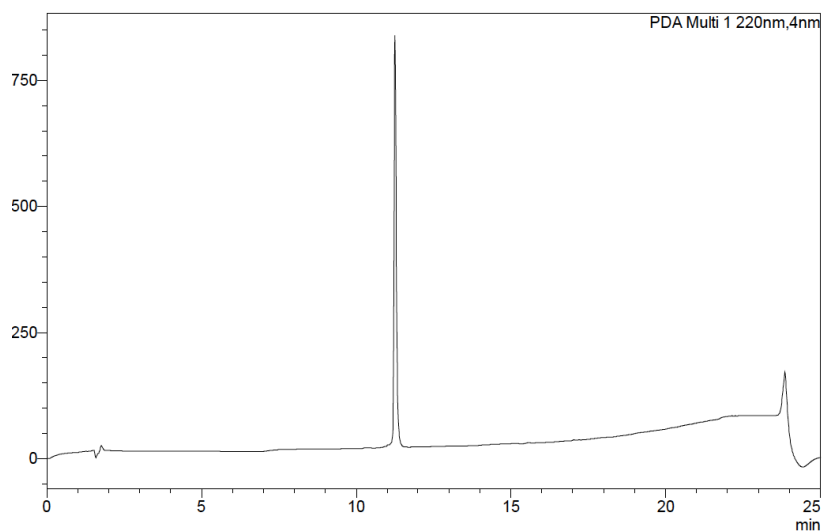

**Figure S13.** Chromatogram of **22** obtained by an analytical HPLC (Shimadzu UFLC SPD-M20A/DGU-20A3R/LC-20AD) equipped with a Phenomenex Kinetex C18 column (150 mm  $\times$  4.6 mm, 5  $\mu$ m, 100  $\text{\AA}$ ), and monitored by UV detection at 220 nm.  $t_R$ : 11.6 min [linear gradient 10-90% MeCN (0.1% TFA) in H<sub>2</sub>O (0.1% TFA) over 20 min, flow rate of 1 mL/min].

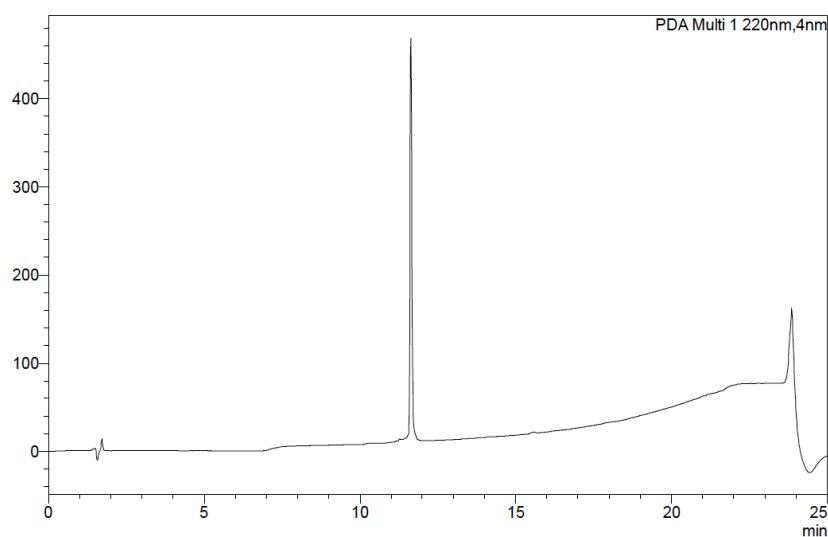

**Figure S14.** Chromatogram of **23** obtained by an analytical HPLC (Shimadzu UFLC SPD-M20A/DGU-20A3R/LC-20AD) equipped with a Phenomenex Kinetex C18 column (150 mm  $\times$  4.6 mm, 5  $\mu$ m, 100  $\text{\AA}$ ), and monitored by UV detection at 220 nm.  $t_R$ : 11.3 min [linear gradient 10-90% MeCN (0.1% TFA) in H<sub>2</sub>O (0.1% TFA) over 20 min, flow rate of 1 mL/min].



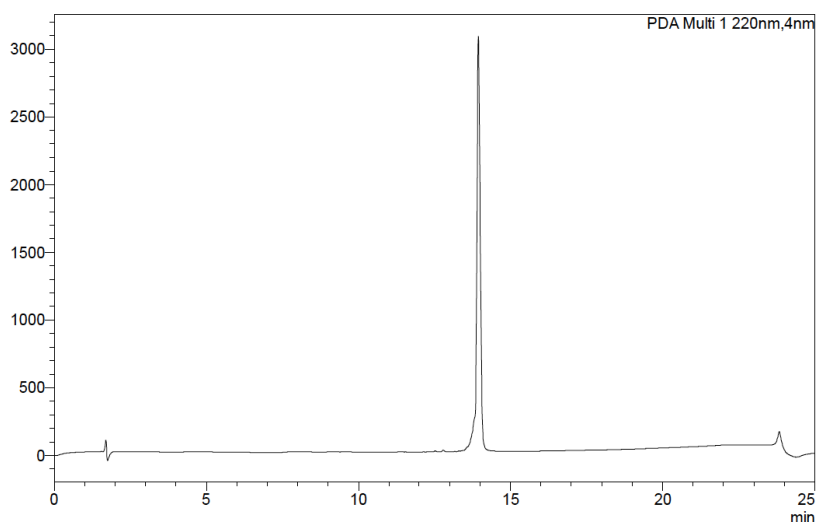

**Figure S15.** Chromatogram of **24** obtained by an analytical HPLC (Shimadzu UFLC SPD-M20A/DGU-20A3R/LC-20AD) equipped with a Phenomenex Kinetex C18 column (150 mm  $\times$  4.6 mm, 5  $\mu$ m, 100  $\text{\AA}$ ), and monitored by UV detection at 220 nm.  $t_R$ : 13.9 min [linear gradient 10-90% MeCN (0.1% TFA) in H<sub>2</sub>O (0.1% TFA) over 20 min, flow rate of 1 mL/min].

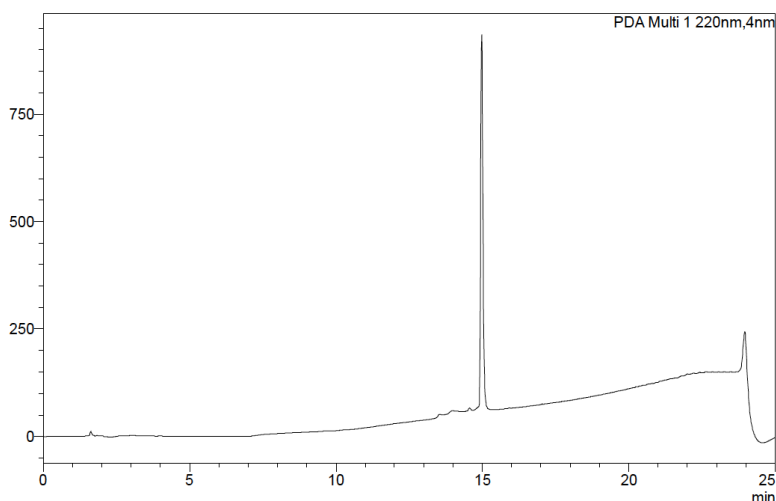

**Figure S16.** Chromatogram of **25** obtained by an analytical HPLC (Shimadzu UFLC SPD-M20A/DGU-20A3R/LC-20AD) equipped with a Phenomenex Kinetex C18 column (150 mm  $\times$  4.6 mm, 5  $\mu$ m, 100  $\text{\AA}$ ), and monitored by UV detection at 220 nm.  $t_R$ : 14.9 min [linear gradient 10-90% MeCN (0.1% TFA) in H<sub>2</sub>O (0.1% TFA) over 20 min, flow rate of 1 mL/min].

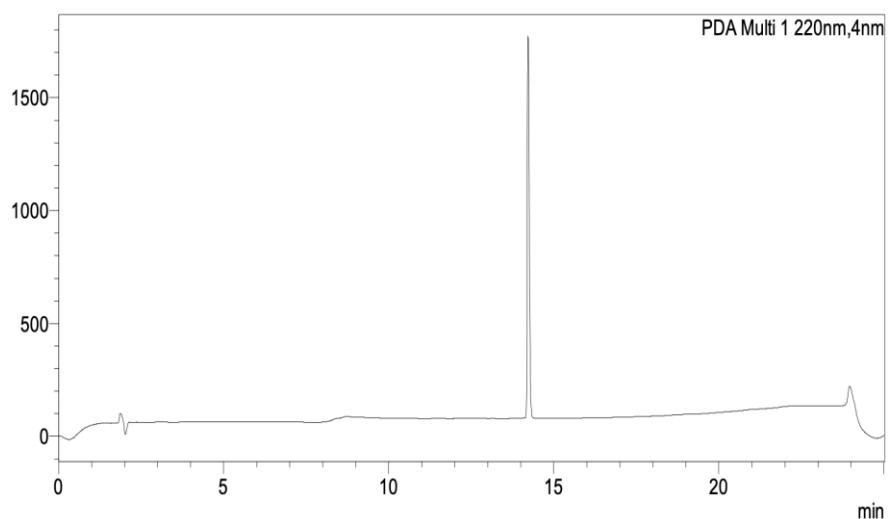

**Figure S17.** Chromatogram of **26** obtained by an analytical HPLC (Shimadzu UFLC SPD-M20A/DGU-20A3R/LC-20AD) equipped with a Phenomenex Kinetex C18 column (150 mm  $\times$  4.6 mm, 5  $\mu$ m, 100  $\text{\AA}$ ), and monitored by UV detection at 220 nm.  $t_R$ : 14.2 min [linear gradient 10-90% MeCN (0.1% TFA) in H<sub>2</sub>O (0.1% TFA) over 20 min, flow rate of 1 mL/min].
